# Supplementary material
Source: publisher figshare collection journal article supplement (https://karger.figshare.com/articles/dataset/_/5127916)
Supplement: Supplementary file 1 [file 1]

| Parameter                                            | Girls             |                         |                         |            | Boys       |            |            |
|------------------------------------------------------|-------------------|-------------------------|-------------------------|------------|------------|------------|------------|
|                                                      | SHOX-D-LWS        | SHOX-D-ISS              | SHOX-D-All              | TS-GH      | SHOX-D-LWS | SHOX-D-ISS | SHOX-D-All |
| N <sup>a,b</sup>                                     | 15                | 10                      | 27                      | 26         | 11         | 13         | 24         |
| Chronological age (years)                            | 7.9 ± 2.0         | 7.0 ± 2.4               | 7.3 ± 2.2               | 7.5 ± 1.9  | 7.5 ± 2.6  | 7.4 ± 2.6  | 7.5 ± 2.6  |
| <b>Hand/wrist:</b>                                   |                   |                         |                         |            |            |            |            |
| Short 4 <sup>th</sup> metacarpal (%)                 | 13.3              | 30.0                    | 19.2                    | 42.3       | 18.2       | 15.4       | 16.7       |
| Short 5 <sup>th</sup> metacarpal (%)                 | 6.7               | 10.0                    | 7.7 <sup>■</sup>        | 34.6       | 18.2       | 15.4       | 16.7       |
| <b>Forearm:</b>                                      |                   |                         |                         |            |            |            |            |
| Radial bowing (%)                                    | 93.3 <sup>★</sup> | 44.4                    | 76.0 <sup>■</sup>       | 36.0*      | 63.6       | 30.8       | 45.8       |
| Ulnar bowing (%)                                     | 20.0              | 0                       | 12.0                    | 16.0       | 36.4       | 7.7        | 20.8       |
| Elbow deformities (%)                                | 33.3              | 11.1                    | 28.0                    | 20.8       | 18.2       | 7.7        | 12.5       |
| Ulnar variance (°)                                   | 6.1 ± 3.4         | 4.4 ± 4.8               | 5.2 ± 4.0               | 4.4 ± 4.2  | 3.3 ± 2.1  | 2.6 ± 2.5  | 2.9 ± 2.3  |
| Radial length (cm)                                   | 12.6 ± 1.6        | 12.1 ± 2.0 <sup>◐</sup> | 12.4 ± 1.7 <sup>■</sup> | 13.6 ± 1.6 | 13.9 ± 2.3 | 13.4 ± 2.4 | 13.6 ± 2.3 |
| Ulnar length (cm)                                    | 13.8 ± 1.8        | 13.2 ± 2.1              | 13.5 ± 1.9              | 14.5 ± 2.0 | 14.6 ± 2.4 | 14.1 ± 2.7 | 14.3 ± 2.5 |
| <b>Lower leg:</b>                                    |                   |                         |                         |            |            |            |            |
| Bowing of tibia (%)                                  | 20.0              | 0                       | 12.5                    | 16.7       | 0          | 15.4       | 8.7        |
| Abnormal tibial tuberosities (%)                     | 20.0              | 0 <sup>◐</sup>          | 12.5 <sup>■</sup>       | 45.8       | 0          | 23.1       | 13.0       |
| Hypertrophic medial femoral condyle (%) <sup>c</sup> | 13.3              | 25.0                    | 16.7 <sup>■</sup>       | 54.2*      | 0          | 7.7        | 4.3        |
| Length of tibia (cm)                                 | 22.0 ± 3.3        | 20.1 ± 3.3              | 21.2 ± 3.4              | 21.5 ± 2.6 | 23.0 ± 3.8 | 21.5 ± 3.8 | 22.2 ± 3.8 |
| Length of fibula (cm)                                | 20.7 ± 3.6        | 19.4 ± 3.2              | 20.1 ± 3.5              | 20.9 ± 2.7 | 22.2 ± 4.0 | 20.8 ± 4.0 | 21.4 ± 4.0 |

<sup>a</sup>Maximum N, lower for some parameters, <sup>b</sup>2 patients with unknown clinical diagnosis, <sup>c</sup>Kosowicz sign

<sup>■</sup>P value for SHOX-D-All vs TS-GH ≤0.05 (short 5<sup>th</sup> metacarpal P=0.038, radial bowing P=0.010, radial length P=0.016, abnormal tibial tuberosities P=0.024, hypertrophic medial femoral condyle P=0.015)

<sup>★</sup>P value for SHOX-D-LWS vs SHOX-D-ISS ≤0.05 (radial bowing P=0.015)

<sup>◐</sup>P value for SHOX-D-ISS vs TS-GH ≤0.05 (radial length p=0.033, abnormal tibial tuberosities P=0.029)

<sup>\*</sup>P value for SHOX-D-LWS vs TS-GH ≤0.05 (radial bowing p<0.001, hypertrophic medial femoral condyle P=0.017)

Supplementary Table S1: Presence of radiological signs and forearm and lower leg bone measurements at baseline split by gender and clinical diagnosis [% of patients affected for radiological signs, and mean ± SD for age and measurements].

| Parameter                                            | At Baseline |            |                         |            | After 2 years of study |              |            |
|------------------------------------------------------|-------------|------------|-------------------------|------------|------------------------|--------------|------------|
|                                                      | SHOX-D-C    | SHOX-D-GH  | SHOX-D-All              | TS-GH      | SHOX-D-C               | SHOX-D-GH    | TS-GH      |
| N <sup>a</sup>                                       | 12          | 15         | 27                      | 26         | 12                     | 15           | 26         |
| <b>Hand/wrist:</b>                                   |             |            |                         |            |                        |              |            |
| Short 4 <sup>th</sup> metacarpal (%)                 | 8.3         | 28.6       | 19.2                    | 42.3       | 16.7                   | 13.3         | 23.1       |
| Short 5 <sup>th</sup> metacarpal (%)                 | 8.3         | 7.1        | 7.7 <sup>■</sup>        | 34.6       | 8.3                    | 6.7          | 3.8        |
| <b>Forearm:</b>                                      |             |            |                         |            |                        |              |            |
| Radial bowing (%)                                    | 75.0        | 76.9*      | 76.0 <sup>■</sup>       | 36.0       | 66.7                   | 73.3*        | 16.7       |
| Ulnar bowing (%)                                     | 8.3         | 15.4       | 12.0                    | 16.0       | 25.0                   | 13.3         | 8.3        |
| Elbow deformities (%)                                | 16.7        | 38.5       | 28.0                    | 20.8       | 8.3                    | 6.7          | 0.0        |
| Ulnar variance (°)                                   | 5.3 ± 4.1   | 5.2 ± 4.2  | 5.2 ± 4.0               | 4.4 ± 4.2  | 10.3 ± 10.0            | 14.0 ± 17.2* | 5.9 ± 4.6  |
| Ulnar variance change from baseline (°)              | -           | -          | -                       | -          | 5.0 ± 7.8              | 10.2 ± 18.6* | 1.9 ± 5.5  |
| Radial length (cm)                                   | 12.2 ± 2.0  | 12.5 ± 1.5 | 12.4 ± 1.7 <sup>■</sup> | 13.6 ± 1.6 | 14.1 ± 2.2             | 14.2 ± 1.6*  | 16.1 ± 1.9 |
| Radial length change from baseline (cm)              | -           | -          | -                       | -          | 1.9 ± 1.0              | 1.9 ± 0.6*   | 2.4 ± 0.7  |
| Ulnar length (cm)                                    | 12.9 ± 2.0  | 14.1 ± 1.7 | 13.5 ± 1.9              | 14.5 ± 2.0 | 15.5 ± 2.6             | 16.0 ± 1.8*  | 17.5 ± 2.1 |
| Ulnar length change from baseline (cm)               | -           | -          | -                       | -          | 2.7 ± 1.8              | 2.1 ± 0.8    | 2.9 ± 0.9  |
| <b>Lower leg:</b>                                    |             |            |                         |            |                        |              |            |
| Bowing of tibia (%)                                  | 9.1         | 15.4       | 12.5                    | 16.7       | 0                      | 6.7          | 7.7        |
| Abnormal tibial tuberosities (%)                     | 9.1         | 15.4       | 12.5 <sup>■</sup>       | 45.8       | 0                      | 6.7          | 32.0       |
| Hypertrophic medial femoral condyle (%) <sup>b</sup> | 18.2        | 15.4*      | 16.7 <sup>■</sup>       | 54.2       | 16.7                   | 20.0         | 36.0       |
| Length of tibia (cm)                                 | 21.2 ± 4.3  | 21.2 ± 2.5 | 21.2 ± 3.4              | 21.5 ± 2.6 | 23.6 ± 4.4             | 24.8 ± 3.0   | 26.0 ± 3.2 |
| Length of tibia change from baseline (cm)            | -           | -          | -                       | -          | 2.5 ± 1.0              | 3.8 ± 1.5    | 4.5 ± 2.6  |
| Length of fibula (cm)                                | 19.8 ± 3.5  | 20.3 ± 3.6 | 20.1 ± 3.5              | 20.9 ± 2.7 | 22.9 ± 4.1             | 24.2 ± 2.8   | 25.3 ± 3.2 |
| Length of fibula change from baseline (cm)           | -           | -          | -                       | -          | 3.1 ± 2.1              | 4.1 ± 1.5    | 4.4 ± 2.7  |

<sup>a</sup>Maximum N, lower for some parameters, <sup>b</sup>Kosowicz sign

<sup>■</sup>P value for SHOX-D-All vs TS-GH ≤0.05 (baseline: short 5<sup>th</sup> metacarpal P=0.038, radial bowing P=0.010, radial length P=0.016, abnormal tibial tuberosities P=0.024, hypertrophic medial femoral condyle P=0.015)

\*P value for SHOX-D-GH vs TS-GH ≤0.05 (baseline: radial bowing P=0.038, hypertrophic medial femoral condyle P=0.035; after 2 years of study: radial bowing P<0.001, ulnar variance P=0.029, ulnar variance change from baseline P=0.033, radial length P=0.004, radial length change from baseline P=0.044, ulnar length P=0.032)

Supplementary Table S2: Presence of radiological signs and forearm and lower leg bone measurements at baseline and after 2 years of study in girls only [% of patients affected for radiological signs and mean ± SD for age and measurements].

| Parameter                                           | At baseline       |            | After 2 years of study |            |
|-----------------------------------------------------|-------------------|------------|------------------------|------------|
|                                                     | SHOX-D-C          | SHOX-D-GH  | SHOX-D-C               | SHOX-D-GH  |
| N <sup>a</sup>                                      | 12                | 12         | 12                     | 12         |
| <b>Hand/wrist:</b>                                  |                   |            |                        |            |
| Short 4 <sup>th</sup> metacarpal (%)                | 8.3               | 25.0       | 8.3                    | 16.7       |
| Short 5 <sup>th</sup> metacarpal (%)                | 8.3               | 25.0       | 0                      | 16.7       |
| <b>Forearm:</b>                                     |                   |            |                        |            |
| Radial bowing (%)                                   | 66.7              | 25.0       | 91.7                   | 58.3       |
| Ulnar bowing (%)                                    | 41.7 <sup>*</sup> | 0          | 8.3                    | 16.7       |
| Elbow deformities (%)                               | 16.7              | 8.3        | 0                      | 8.3        |
| Ulnar variance (°)                                  | 3.2 ± 2.2         | 2.7 ± 2.5  | 7.5 ± 7.9              | 4.0 ± 2.3  |
| Ulnar variance change from baseline (°)             | -                 | -          | 4.3 ± 7.3              | 1.3 ± 4.2  |
| Radial length (cm)                                  | 14.0 ± 2.5        | 13.3 ± 2.2 | 15.4 ± 2.3             | 15.7 ± 2.4 |
| Radial length change from baseline (cm)             | -                 | -          | 1.7 ± 0.7 <sup>*</sup> | 2.3 ± 0.4  |
| Ulnar length (cm)                                   | 14.6 ± 2.6        | 14.1 ± 2.6 | 16.4 ± 2.7             | 16.5 ± 2.7 |
| Ulnar length change from baseline (cm)              | -                 | -          | 2.0 ± 1.1              | 2.4 ± 0.6  |
| <b>Lower leg:</b>                                   |                   |            |                        |            |
| Bowing of tibia (%)                                 | 8.3               | 9.1        | 16.7                   | 8.3        |
| Abnormal tibial tuberosities (%)                    | 16.7              | 9.1        | 16.7                   | 25.0       |
| Hypertrophic medial femoral condyle(%) <sup>b</sup> | 0                 | 9.1        | 16.7                   | 8.3        |
| Length of tibia (cm)                                | 22.9 ± 3.9        | 21.3 ± 3.6 | 25.8 ± 3.8             | 24.7 ± 3.3 |
| Length of tibia change from baseline (cm)           | -                 | -          | 3.4 ± 2.9              | 3.1 ± 1.9  |
| Length of fibula (cm)                               | 22.1 ± 4.2        | 20.6 ± 3.7 | 25.0 ± 3.9             | 23.7 ± 3.5 |
| Length of fibula change from baseline (cm)          | -                 | -          | 3.2 ± 1.7              | 3.1 ± 2.5  |

<sup>a</sup>Maximum N, lower for some parameters, <sup>b</sup>Kosowicz sign

<sup>\*</sup>P value for SHOX-D-GH vs SHOX-D-C ≤0.05 (baseline: ulnar bowing *P*=0.037; after 2 years of study: radial length change from baseline *P*=0.011)

Supplementary Table S3: Presence of radiological signs and forearm and lower leg bone measurements at baseline and after 2 years of study in boys only [% of patients affected for radiological signs and mean ± SD for age and measurements].
